# Supplementary material for: VPS35 regulates parkin substrate AIMP2 toxicity by facilitating lysosomal clearance of AIMP2
Source: PubMed Central journal article supplement (PMC5477581; doi:10.1038/cddis.2017.157), 2017-04-06
Supplement: cddis2017157x1.pdf [file cddis2017157x1.pdf]

## **Supporting Information**

### **VPS35 regulates parkin substrate AIMP2 toxicity by facilitating lysosomal clearance of AIMP2**

Seung Pil Yun, Hyojung Kim, Sangwoo Ham, Seung-Hwan Kwon, Gum Hwa Lee, Joo-Ho Shin, Sang Hun Lee, Han Seok Ko, and Yunjong Lee

**a**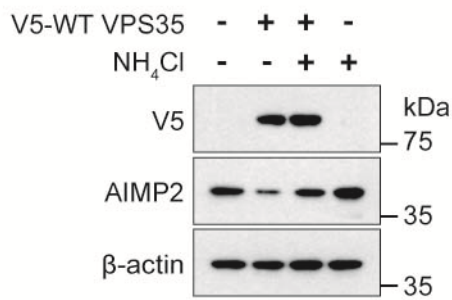**b**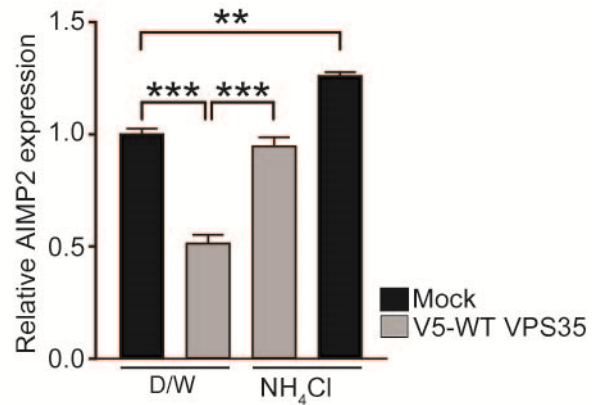

### Figure S1. VPS35 enhances AIMP2 degradation via lysosome

(a) SH-SY5Y cells were transiently transfected with mock or V5-WT VPS35 and treated with  $\text{NH}_4\text{Cl}$  or distilled water as a vehicle (D/W). At 36 hrs post transfection,  $\text{NH}_4\text{Cl}$  (10 mM, 12 hrs) were used to treat cells. Total protein was extracted and immunoblotted with V5 and AIMP2 antibody to monitor their levels.  $\beta$ -actin was used as an internal loading control. (b) Normalized levels of AIMP2 expression in SH-SY5Y cells transfected with and treated with the indicated combination ( $n = 3$ ). Error bars represent the mean  $\pm$  S.E.M. Two-way ANOVA followed by Bonferroni post hoc analysis was used for multiple group comparison. \*\* $P < 0.01$ , \*\*\* $P < 0.001$

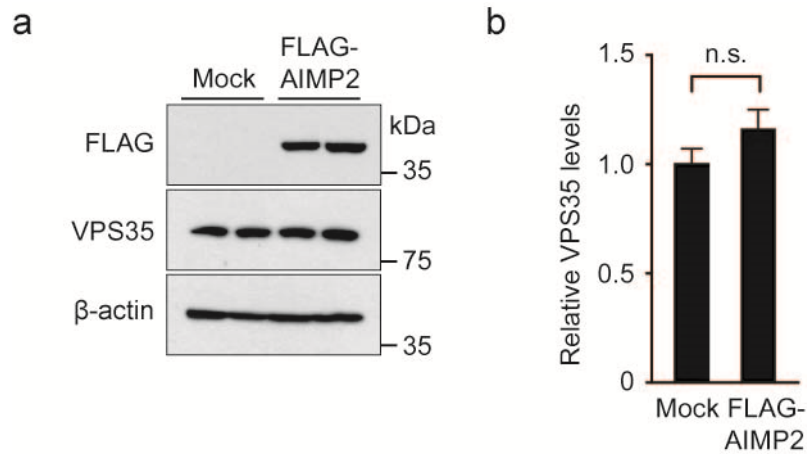

**Figure S2. AIMP2 accumulation has no effect on VPS35 levels**

(a) SH-SY5Y cells were transiently transfected with control or FLAG-AIMP2. At 48 hrs post transfection, total protein was extracted and immunoblotted with FLAG and VPS35 antibody to monitor their levels.  $\beta$ -actin was used as an internal loading control. (b) Normalized levels of VPS35 in SH-SY5Y cells transfected with mock or FLAG-AIMP2 constructs ( $n = 3$ ). Error bars represent the mean  $\pm$  S.E.M. Unpaired two-tailed Student's  $t$  test was used for statistical analysis.
